# Supplementary material for: First insights on the genetic diversity of MDR Mycobacterium tuberculosis in Lebanon
Source: PubMed Central journal article supplement (PMC6311033; doi:10.1186/s12879-018-3626-3), 2018-12-29
Supplement: 12879_2018_3626_MOESM2_ESM.pdf [file 12879_2018_3626_MOESM2_ESM.pdf]

| <b>List of <i>M. tuberculosis</i> strains used in this study</b>   |                      |                   |
|--------------------------------------------------------------------|----------------------|-------------------|
| <b>Lineages/Sublineages generated using TGS-TB and TB Profiler</b> |                      |                   |
| Strains ID                                                         | SRA_ID or GenBank_ID | Lineage           |
| TB-4                                                               | PVWR00000000         | 4                 |
| TB-5                                                               | PYPT00000000         | BOV               |
| TB-7                                                               | PYPU00000000         | 4.7               |
| TB-8                                                               | PYPV00000000         | BOV               |
| TB-9                                                               | PYPW00000000         | 4.2.1             |
| TB-10                                                              | PYPX00000000         | 4.1.2.1           |
| TB-12                                                              | PYPY00000000         | 3                 |
| TB-13                                                              | PYPZ00000000         | 1.2.1             |
| TB-14                                                              | PYQA00000000         | 4.8               |
| TB-15                                                              | PYQB00000000         | 4.6.2.2           |
| TB-16                                                              | PYQC00000000         | 3.1.1             |
| TB-17                                                              | PYQD00000000         | 2.2.1             |
| TB-20                                                              | PYQE00000000         | 4.1.1.1           |
| S00007279                                                          | ERR117694            | 1.1.1             |
| S00019855                                                          | ERR387008            | 1.1.1.1           |
| EAI5                                                               | NC_021740            | 1.1.2             |
| S00007273                                                          | ERR114427            | 1.1.2             |
| S00018368                                                          | ERR351915+ERR386847  | 1.1.3             |
| S00013408                                                          | ERR278529+ERR386888  | 1.2.1             |
| Bir_270                                                            | ERR046881            | 1.2.2             |
| GX_450708                                                          | SRR1710066           | 2.1               |
| GX_451017                                                          | SRR1710070           | 2.1 proto-Beijing |
| hjl100113                                                          | SRS475367            | 2.2.1             |
| CCDC5180                                                           | NC_017522            | 2.2.1             |
| 08_0205                                                            | SRR1710073           | 2.2.1 MG2         |
| SJ432                                                              | SRR1710110           | 2.2.1 MG3         |
| 0710Y                                                              | ERR117454            | 2.2.1 MG3         |
| M08_14556                                                          | ERR015616            | 2.2.1 MG3         |
| MTB_GT_333                                                         | ERR234208            | 2.2.1 MG3         |
| -NA-                                                               | ERR019574            | 2.2.1 MG3         |
| 2533E                                                              | ERR234658            | 2.2.1 PG1         |
| GQ366                                                              | ERR234133            | 2.2.1 PG1         |
| L2_GQ1164                                                          | ERR234116            | 2.2.1 PG2         |
| L2_GQ-1343                                                         | ERR234121            | 2.2.1.1           |
| L2_N0130                                                           | ERR234263            | 2.2.1.2           |
| 10_0554                                                            | SRR1710083           | 2.2.2             |
| Shanghai_09-1608                                                   | SRS790114            | 2.2.2 MG1         |
| SJ649                                                              | SRR1710111           | 2.2.2 MG1         |
| S00007361                                                          | ERR114513            | 3                 |
| S00007291                                                          | ERR114453            | 3.1.1             |

|                  |                     |           |
|------------------|---------------------|-----------|
| S00018322        | ERR351869+ERR386801 | 3.1.2     |
| S00007295        | ERR117696           | 3.1.2.1   |
| S00007298        | ERR114442           | 3.1.2.2   |
| H37Rv            | NC_000962           | 4         |
| S00017318        | ERR330651           | 4         |
| H37Ra_ATCC_25177 | NC_009525           | 4         |
| L4_DY195         | ERR234201           | 4.1       |
| Bir_74           | ERR038277           | 4.1.1     |
| S00007381        | ERR114477           | 4.1.1.1   |
| MT0016           | SRR058116           | 4.1.1.2   |
| S00007348        | ERR117732           | 4.1.1.3   |
| S00013476        | ERR278597+ERR386956 | 4.1.2     |
| 7199-99          | NC_020089           | 4.1.2.1   |
| Haarlem          | NC_022350           | 4.1.2.1   |
| ATCC_35801       | NC_020559           | 4.1.2.1   |
| S00018390        | ERR351937+ERR386869 | 4.1.2.1   |
| S00009328        | ERR228183           | 4.2.1     |
| S00017375        | ERR330708           | 4.2.2     |
| S00009367        | ERR228222           | 4.2.2.1   |
| S00019824        | ERR386977           | 4.3.1     |
| S00013789        | ERR294209           | 4.3.2     |
| S00018339        | ERR351886+ERR386818 | 4.3.2.1   |
| F11              | NC_009565           | 4.3.2.1   |
| S00013400        | ERR278521+ERR386880 | 4.3.3     |
| CTRI-2           | NC_017524           | 4.3.3     |
| KZN_4207         | NC_016768           | 4.3.3     |
| KZN_605          | NC_018078           | 4.3.3     |
| KZN_1435         | NC_012943           | 4.3.3     |
| S00013459        | ERR278580+ERR386939 | 4.3.4     |
| S00013422        | ERR278543+ERR386902 | 4.3.4.1   |
| FFUL_KAUST_MTB26 | ERR275206           | 4.3.4.2   |
| S00013762        | ERR294182           | 4.3.4.2.1 |
| S00018378        | ERR351925+ERR386857 | 4.4       |
| S00013201        | ERR270699           | 4.4.1     |
| S00013203        | ERR270701           | 4.4.1.1   |
| Bir_79           | ERR038282           | 4.4.1.2   |
| S00013126        | ERR270624           | 4.4.2     |
| S00017336        | ERR330669           | 4.5       |
| S00018392        | ERR351939+ERR386871 | 4.6       |
| S00019843        | ERR386996           | 4.6.1.1   |
| S00007206        | ERR123926           | 4.6.1.2   |
| S00013416        | ERR278537+ERR386896 | 4.6.2     |
| Bir_225          | ERR046839           | 4.6.2.1   |

|           |           |         |
|-----------|-----------|---------|
| S00007213 | ERR123915 | 4.6.2.2 |
| S00017343 | ERR330676 | 4.7     |
| S00013760 | ERR294180 | 4.8     |
| Bir_426   | ERR072039 | 4.9     |
| S00013829 | ERR294249 | 5       |
| L6_N0091  | ERR234254 | 6       |
| S00019848 | ERR387001 | BOV     |
| Mt256     | ERR181435 | 7       |
