# Supplementary material for: First insights on the genetic diversity of MDR Mycobacterium tuberculosis in Lebanon
Source: PubMed Central journal article supplement (PMC6311033; doi:10.1186/s12879-018-3626-3), 2018-12-29
Supplement: 12879_2018_3626_MOESM3_ESM.pdf [file 12879_2018_3626_MOESM3_ESM.pdf]

**S3 Table. Repeat regions on M. tuberculosis H37Rv genome**

| Start   | End       | Note                           |
|---------|-----------|--------------------------------|
| 23173   | - 23273   | H37Rv annotation (NC_000962.3) |
| 79507   | - 79551   | H37Rv annotation (NC_000962.3) |
| 80236   | - 80550   | H37Rv annotation (NC_000962.3) |
| 103713  | - 105215  | H37Rv annotation (NC_000962.3) |
| 154073  | - 154125  | H37Rv annotation (NC_000962.3) |
| 154126  | - 154178  | H37Rv annotation (NC_000962.3) |
| 154179  | - 154231  | H37Rv annotation (NC_000962.3) |
| 206812  | - 206850  | H37Rv annotation (NC_000962.3) |
| 206869  | - 206907  | H37Rv annotation (NC_000962.3) |
| 272855  | - 272955  | H37Rv annotation (NC_000962.3) |
| 547488  | - 547517  | H37Rv annotation (NC_000962.3) |
| 580578  | - 580654  | H37Rv annotation (NC_000962.3) |
| 580655  | - 580731  | H37Rv annotation (NC_000962.3) |
| 580732  | - 580808  | H37Rv annotation (NC_000962.3) |
| 616828  | - 616878  | H37Rv annotation (NC_000962.3) |
| 642754  | - 642811  | H37Rv annotation (NC_000962.3) |
| 701247  | - 701369  | H37Rv annotation (NC_000962.3) |
| 703912  | - 703985  | H37Rv annotation (NC_000962.3) |
| 706790  | - 706863  | H37Rv annotation (NC_000962.3) |
| 709425  | - 709548  | H37Rv annotation (NC_000962.3) |
| 709585  | - 709663  | H37Rv annotation (NC_000962.3) |
| 711624  | - 711702  | H37Rv annotation (NC_000962.3) |
| 795467  | - 795518  | H37Rv annotation (NC_000962.3) |
| 802429  | - 802477  | H37Rv annotation (NC_000962.3) |
| 812835  | - 812921  | H37Rv annotation (NC_000962.3) |
| 812922  | - 812975  | H37Rv annotation (NC_000962.3) |
| 863155  | - 863255  | H37Rv annotation (NC_000962.3) |
| 889017  | - 889020  | H37Rv annotation (NC_000962.3) |
| 889021  | - 889048  | H37Rv annotation (NC_000962.3) |
| 890348  | - 890375  | H37Rv annotation (NC_000962.3) |
| 890376  | - 890379  | H37Rv annotation (NC_000962.3) |
| 960173  | - 960225  | H37Rv annotation (NC_000962.3) |
| 960226  | - 960278  | H37Rv annotation (NC_000962.3) |
| 960279  | - 960333  | H37Rv annotation (NC_000962.3) |
| 1025458 | - 1025472 | H37Rv annotation (NC_000962.3) |
| 1026879 | - 1026893 | H37Rv annotation (NC_000962.3) |
| 1027061 | - 1027076 | H37Rv annotation (NC_000962.3) |
| 1029345 | - 1029360 | H37Rv annotation (NC_000962.3) |
| 1164572 | - 1164589 | H37Rv annotation (NC_000962.3) |
| 1165532 | - 1165549 | H37Rv annotation (NC_000962.3) |
| 1179345 | - 1179395 | H37Rv annotation (NC_000962.3) |
| 1251621 | - 1252945 | H37Rv annotation (NC_000962.3) |
| 1276296 | - 1277643 | H37Rv annotation (NC_000962.3) |
| 1277843 | - 1277846 | H37Rv annotation (NC_000962.3) |
| 1277847 | - 1277863 | H37Rv annotation (NC_000962.3) |
| 1278800 | - 1278816 | H37Rv annotation (NC_000962.3) |
| 1278817 | - 1278820 | H37Rv annotation (NC_000962.3) |
| 1305495 | - 1305556 | H37Rv annotation (NC_000962.3) |
| 1305557 | - 1305618 | H37Rv annotation (NC_000962.3) |
| 1305619 | - 1305661 | H37Rv annotation (NC_000962.3) |
| 1456585 | - 1456627 | H37Rv annotation (NC_000962.3) |
| 1457453 | - 1457504 | H37Rv annotation (NC_000962.3) |
| 1457505 | - 1457557 | H37Rv annotation (NC_000962.3) |
| 1468143 | - 1468161 | H37Rv annotation (NC_000962.3) |
| 1469633 | - 1469651 | H37Rv annotation (NC_000962.3) |
| 1507531 | - 1507581 | H37Rv annotation (NC_000962.3) |
| 1541949 | - 1541951 | H37Rv annotation (NC_000962.3) |

|         |   |         |                                |
|---------|---|---------|--------------------------------|
| 1543307 | - | 1543309 | H37Rv annotation (NC_000962.3) |
| 1612558 | - | 1612578 | H37Rv annotation (NC_000962.3) |
| 1612579 | - | 1612599 | H37Rv annotation (NC_000962.3) |
| 1612600 | - | 1612620 | H37Rv annotation (NC_000962.3) |
| 1612621 | - | 1612641 | H37Rv annotation (NC_000962.3) |
| 1612642 | - | 1612662 | H37Rv annotation (NC_000962.3) |
| 1625366 | - | 1625418 | H37Rv annotation (NC_000962.3) |
| 1633531 | - | 1634790 | H37Rv annotation (NC_000962.3) |
| 1637133 | - | 1638392 | H37Rv annotation (NC_000962.3) |
| 1644261 | - | 1644313 | H37Rv annotation (NC_000962.3) |
| 1644314 | - | 1644364 | H37Rv annotation (NC_000962.3) |
| 1779266 | - | 1779277 | H37Rv annotation (NC_000962.3) |
| 1779959 | - | 1780047 | H37Rv annotation (NC_000962.3) |
| 1780485 | - | 1780573 | H37Rv annotation (NC_000962.3) |
| 1788514 | - | 1789811 | H37Rv annotation (NC_000962.3) |
| 1788514 | - | 1788525 | H37Rv annotation (NC_000962.3) |
| 1830074 | - | 1830125 | H37Rv annotation (NC_000962.3) |
| 1907460 | - | 1907515 | H37Rv annotation (NC_000962.3) |
| 1907516 | - | 1907571 | H37Rv annotation (NC_000962.3) |
| 1927218 | - | 1928589 | H37Rv annotation (NC_000962.3) |
| 1938093 | - | 1938145 | H37Rv annotation (NC_000962.3) |
| 1944756 | - | 1944808 | H37Rv annotation (NC_000962.3) |
| 1982887 | - | 1982964 | H37Rv annotation (NC_000962.3) |
| 1982965 | - | 1983042 | H37Rv annotation (NC_000962.3) |
| 1983043 | - | 1983120 | H37Rv annotation (NC_000962.3) |
| 1983121 | - | 1983198 | H37Rv annotation (NC_000962.3) |
| 1983199 | - | 1983276 | H37Rv annotation (NC_000962.3) |
| 1983277 | - | 1983354 | H37Rv annotation (NC_000962.3) |
| 1987703 | - | 1987730 | H37Rv annotation (NC_000962.3) |
| 1989030 | - | 1989057 | H37Rv annotation (NC_000962.3) |
| 1996101 | - | 1996128 | H37Rv annotation (NC_000962.3) |
| 1997428 | - | 1997455 | H37Rv annotation (NC_000962.3) |
| 1998584 | - | 1998597 | H37Rv annotation (NC_000962.3) |
| 1999800 | - | 1999813 | H37Rv annotation (NC_000962.3) |
| 2059441 | - | 2059498 | H37Rv annotation (NC_000962.3) |
| 2059518 | - | 2059575 | H37Rv annotation (NC_000962.3) |
| 2163323 | - | 2163392 | H37Rv annotation (NC_000962.3) |
| 2163393 | - | 2163461 | H37Rv annotation (NC_000962.3) |
| 2163462 | - | 2163530 | H37Rv annotation (NC_000962.3) |
| 2163741 | - | 2163809 | H37Rv annotation (NC_000962.3) |
| 2163810 | - | 2163878 | H37Rv annotation (NC_000962.3) |
| 2163879 | - | 2163947 | H37Rv annotation (NC_000962.3) |
| 2163948 | - | 2164016 | H37Rv annotation (NC_000962.3) |
| 2164017 | - | 2164085 | H37Rv annotation (NC_000962.3) |
| 2195989 | - | 2197350 | H37Rv annotation (NC_000962.3) |
| 2330147 | - | 2330225 | H37Rv annotation (NC_000962.3) |
| 2365414 | - | 2365441 | H37Rv annotation (NC_000962.3) |
| 2366741 | - | 2366768 | H37Rv annotation (NC_000962.3) |
| 2372437 | - | 2372492 | H37Rv annotation (NC_000962.3) |
| 2372494 | - | 2372549 | H37Rv annotation (NC_000962.3) |
| 2430117 | - | 2430144 | H37Rv annotation (NC_000962.3) |
| 2431444 | - | 2431471 | H37Rv annotation (NC_000962.3) |
| 2458392 | - | 2458449 | H37Rv annotation (NC_000962.3) |
| 2493801 | - | 2493818 | H37Rv annotation (NC_000962.3) |
| 2522173 | - | 2522230 | H37Rv annotation (NC_000962.3) |
| 2523184 | - | 2523236 | H37Rv annotation (NC_000962.3) |
| 2531898 | - | 2531950 | H37Rv annotation (NC_000962.3) |
| 2531951 | - | 2532003 | H37Rv annotation (NC_000962.3) |

|         |   |         |                                |
|---------|---|---------|--------------------------------|
| 2532004 | - | 2532056 | H37Rv annotation (NC_000962.3) |
| 2532057 | - | 2532109 | H37Rv annotation (NC_000962.3) |
| 2532110 | - | 2532162 | H37Rv annotation (NC_000962.3) |
| 2532163 | - | 2532212 | H37Rv annotation (NC_000962.3) |
| 2550011 | - | 2550013 | H37Rv annotation (NC_000962.3) |
| 2550014 | - | 2550041 | H37Rv annotation (NC_000962.3) |
| 2551341 | - | 2551368 | H37Rv annotation (NC_000962.3) |
| 2551369 | - | 2551371 | H37Rv annotation (NC_000962.3) |
| 2635577 | - | 2635604 | H37Rv annotation (NC_000962.3) |
| 2636904 | - | 2636931 | H37Rv annotation (NC_000962.3) |
| 2687128 | - | 2687179 | H37Rv annotation (NC_000962.3) |
| 2687180 | - | 2687257 | H37Rv annotation (NC_000962.3) |
| 2716315 | - | 2716391 | H37Rv annotation (NC_000962.3) |
| 2720644 | - | 2720656 | H37Rv annotation (NC_000962.3) |
| 2721844 | - | 2721856 | H37Rv annotation (NC_000962.3) |
| 2762762 | - | 2763061 | H37Rv annotation (NC_000962.3) |
| 2763397 | - | 2763696 | H37Rv annotation (NC_000962.3) |
| 2784614 | - | 2784642 | H37Rv annotation (NC_000962.3) |
| 2785942 | - | 2785970 | H37Rv annotation (NC_000962.3) |
| 2800671 | - | 2800918 | H37Rv annotation (NC_000962.3) |
| 2806368 | - | 2806625 | H37Rv annotation (NC_000962.3) |
| 2972106 | - | 2972108 | H37Rv annotation (NC_000962.3) |
| 2972109 | - | 2972136 | H37Rv annotation (NC_000962.3) |
| 2973436 | - | 2973463 | H37Rv annotation (NC_000962.3) |
| 2973464 | - | 2973466 | H37Rv annotation (NC_000962.3) |
| 2983019 | - | 2983033 | H37Rv annotation (NC_000962.3) |
| 2996003 | - | 2996053 | H37Rv annotation (NC_000962.3) |
| 2996054 | - | 2996104 | H37Rv annotation (NC_000962.3) |
| 2996105 | - | 2996155 | H37Rv annotation (NC_000962.3) |
| 3007063 | - | 3007115 | H37Rv annotation (NC_000962.3) |
| 3007116 | - | 3007168 | H37Rv annotation (NC_000962.3) |
| 3007169 | - | 3007221 | H37Rv annotation (NC_000962.3) |
| 3013612 | - | 3013687 | H37Rv annotation (NC_000962.3) |
| 3073055 | - | 3073112 | H37Rv annotation (NC_000962.3) |
| 3119185 | - | 3123576 | H37Rv annotation (NC_000962.3) |
| 3119185 | - | 3119220 | H37Rv annotation (NC_000962.3) |
| 3119259 | - | 3119294 | H37Rv annotation (NC_000962.3) |
| 3119335 | - | 3119370 | H37Rv annotation (NC_000962.3) |
| 3119411 | - | 3119446 | H37Rv annotation (NC_000962.3) |
| 3119484 | - | 3119519 | H37Rv annotation (NC_000962.3) |
| 3119556 | - | 3119591 | H37Rv annotation (NC_000962.3) |
| 3119627 | - | 3119662 | H37Rv annotation (NC_000962.3) |
| 3119701 | - | 3119736 | H37Rv annotation (NC_000962.3) |
| 3119777 | - | 3119812 | H37Rv annotation (NC_000962.3) |
| 3119848 | - | 3119883 | H37Rv annotation (NC_000962.3) |
| 3119921 | - | 3119956 | H37Rv annotation (NC_000962.3) |
| 3119995 | - | 3120030 | H37Rv annotation (NC_000962.3) |
| 3120068 | - | 3120103 | H37Rv annotation (NC_000962.3) |
| 3120141 | - | 3120176 | H37Rv annotation (NC_000962.3) |
| 3120213 | - | 3120248 | H37Rv annotation (NC_000962.3) |
| 3120285 | - | 3120320 | H37Rv annotation (NC_000962.3) |
| 3120359 | - | 3120394 | H37Rv annotation (NC_000962.3) |
| 3120433 | - | 3120468 | H37Rv annotation (NC_000962.3) |
| 3120504 | - | 3120523 | H37Rv annotation (NC_000962.3) |
| 3121882 | - | 3121897 | H37Rv annotation (NC_000962.3) |
| 3121938 | - | 3121973 | H37Rv annotation (NC_000962.3) |
| 3122013 | - | 3122048 | H37Rv annotation (NC_000962.3) |
| 3122086 | - | 3122121 | H37Rv annotation (NC_000962.3) |

|         |   |         |                                |
|---------|---|---------|--------------------------------|
| 3122158 | - | 3122193 | H37Rv annotation (NC_000962.3) |
| 3122230 | - | 3122265 | H37Rv annotation (NC_000962.3) |
| 3122303 | - | 3122338 | H37Rv annotation (NC_000962.3) |
| 3122375 | - | 3122410 | H37Rv annotation (NC_000962.3) |
| 3122436 | - | 3122471 | H37Rv annotation (NC_000962.3) |
| 3122513 | - | 3122548 | H37Rv annotation (NC_000962.3) |
| 3122585 | - | 3122620 | H37Rv annotation (NC_000962.3) |
| 3122661 | - | 3122696 | H37Rv annotation (NC_000962.3) |
| 3122738 | - | 3122773 | H37Rv annotation (NC_000962.3) |
| 3122811 | - | 3122846 | H37Rv annotation (NC_000962.3) |
| 3122882 | - | 3122917 | H37Rv annotation (NC_000962.3) |
| 3122955 | - | 3122990 | H37Rv annotation (NC_000962.3) |
| 3123029 | - | 3123064 | H37Rv annotation (NC_000962.3) |
| 3123102 | - | 3123137 | H37Rv annotation (NC_000962.3) |
| 3123173 | - | 3123208 | H37Rv annotation (NC_000962.3) |
| 3123248 | - | 3123283 | H37Rv annotation (NC_000962.3) |
| 3123318 | - | 3123353 | H37Rv annotation (NC_000962.3) |
| 3123390 | - | 3123425 | H37Rv annotation (NC_000962.3) |
| 3123467 | - | 3123502 | H37Rv annotation (NC_000962.3) |
| 3123541 | - | 3123576 | H37Rv annotation (NC_000962.3) |
| 3155874 | - | 3155927 | H37Rv annotation (NC_000962.3) |
| 3155928 | - | 3155981 | H37Rv annotation (NC_000962.3) |
| 3155982 | - | 3156035 | H37Rv annotation (NC_000962.3) |
| 3156036 | - | 3156089 | H37Rv annotation (NC_000962.3) |
| 3160522 | - | 3160583 | H37Rv annotation (NC_000962.3) |
| 3171468 | - | 3171518 | H37Rv annotation (NC_000962.3) |
| 3171522 | - | 3171572 | H37Rv annotation (NC_000962.3) |
| 3171576 | - | 3171616 | H37Rv annotation (NC_000962.3) |
| 3181794 | - | 3181836 | H37Rv annotation (NC_000962.3) |
| 3192202 | - | 3192254 | H37Rv annotation (NC_000962.3) |
| 3192255 | - | 3192307 | H37Rv annotation (NC_000962.3) |
| 3192308 | - | 3192360 | H37Rv annotation (NC_000962.3) |
| 3318835 | - | 3318889 | H37Rv annotation (NC_000962.3) |
| 3319468 | - | 3319568 | H37Rv annotation (NC_000962.3) |
| 3319569 | - | 3319666 | H37Rv annotation (NC_000962.3) |
| 3333768 | - | 3333773 | H37Rv annotation (NC_000962.3) |
| 3335787 | - | 3335792 | H37Rv annotation (NC_000962.3) |
| 3381351 | - | 3381365 | H37Rv annotation (NC_000962.3) |
| 3382660 | - | 3382674 | H37Rv annotation (NC_000962.3) |
| 3481399 | - | 3481413 | H37Rv annotation (NC_000962.3) |
| 3482708 | - | 3482722 | H37Rv annotation (NC_000962.3) |
| 3551227 | - | 3551229 | H37Rv annotation (NC_000962.3) |
| 3551230 | - | 3551257 | H37Rv annotation (NC_000962.3) |
| 3552557 | - | 3552584 | H37Rv annotation (NC_000962.3) |
| 3552585 | - | 3552587 | H37Rv annotation (NC_000962.3) |
| 3552710 | - | 3552712 | H37Rv annotation (NC_000962.3) |
| 3552713 | - | 3552740 | H37Rv annotation (NC_000962.3) |
| 3554040 | - | 3554067 | H37Rv annotation (NC_000962.3) |
| 3554068 | - | 3554070 | H37Rv annotation (NC_000962.3) |
| 3591493 | - | 3591569 | H37Rv annotation (NC_000962.3) |
| 3626614 | - | 3626666 | H37Rv annotation (NC_000962.3) |
| 3658658 | - | 3658715 | H37Rv annotation (NC_000962.3) |
| 3704895 | - | 3705004 | H37Rv annotation (NC_000962.3) |
| 3710382 | - | 3710409 | H37Rv annotation (NC_000962.3) |
| 3711709 | - | 3711736 | H37Rv annotation (NC_000962.3) |
| 3743198 | - | 3743404 | H37Rv annotation (NC_000962.3) |
| 3743402 | - | 3743510 | H37Rv annotation (NC_000962.3) |
| 3743508 | - | 3743605 | H37Rv annotation (NC_000962.3) |

|         |   |         |                                    |
|---------|---|---------|------------------------------------|
| 3769514 | - | 3769720 | H37Rv annotation (NC_000962.3)     |
| 3769754 | - | 3769862 | H37Rv annotation (NC_000962.3)     |
| 3770994 | - | 3771091 | H37Rv annotation (NC_000962.3)     |
| 3795058 | - | 3795085 | H37Rv annotation (NC_000962.3)     |
| 3796385 | - | 3796412 | H37Rv annotation (NC_000962.3)     |
| 3799987 | - | 3800011 | H37Rv annotation (NC_000962.3)     |
| 3801530 | - | 3801554 | H37Rv annotation (NC_000962.3)     |
| 3883550 | - | 3884921 | H37Rv annotation (NC_000962.3)     |
| 3890779 | - | 3890806 | H37Rv annotation (NC_000962.3)     |
| 3892106 | - | 3892133 | H37Rv annotation (NC_000962.3)     |
| 3945098 | - | 3945597 | H37Rv annotation (NC_000962.3)     |
| 3950830 | - | 3951329 | H37Rv annotation (NC_000962.3)     |
| 3991568 | - | 3991625 | H37Rv annotation (NC_000962.3)     |
| 4052949 | - | 4052966 | H37Rv annotation (NC_000962.3)     |
| 4052971 | - | 4052994 | H37Rv annotation (NC_000962.3)     |
| 4052995 | - | 4053105 | H37Rv annotation (NC_000962.3)     |
| 4053004 | - | 4053021 | H37Rv annotation (NC_000962.3)     |
| 4053106 | - | 4053216 | H37Rv annotation (NC_000962.3)     |
| 4053217 | - | 4053327 | H37Rv annotation (NC_000962.3)     |
| 4053328 | - | 4053438 | H37Rv annotation (NC_000962.3)     |
| 4053439 | - | 4053549 | H37Rv annotation (NC_000962.3)     |
| 4075615 | - | 4075630 | H37Rv annotation (NC_000962.3)     |
| 4077735 | - | 4077750 | H37Rv annotation (NC_000962.3)     |
| 4078506 | - | 4078518 | H37Rv annotation (NC_000962.3)     |
| 4079786 | - | 4079798 | H37Rv annotation (NC_000962.3)     |
| 4134601 | - | 4134725 | H37Rv annotation (NC_000962.3)     |
| 4348721 | - | 4348773 | H37Rv annotation (NC_000962.3)     |
| 4348774 | - | 4348826 | H37Rv annotation (NC_000962.3)     |
| 4353280 | - | 4353330 | H37Rv annotation (NC_000962.3)     |
| 4353331 | - | 4353381 | H37Rv annotation (NC_000962.3)     |
| 4353382 | - | 4353432 | H37Rv annotation (NC_000962.3)     |
| 80185   | - | 80373   | NUCmer repeat finding (this study) |
| 80927   | - | 82664   | NUCmer repeat finding (this study) |
| 103706  | - | 105076  | NUCmer repeat finding (this study) |
| 103780  | - | 105130  | NUCmer repeat finding (this study) |
| 149572  | - | 149762  | NUCmer repeat finding (this study) |
| 154115  | - | 154186  | NUCmer repeat finding (this study) |
| 154168  | - | 154239  | NUCmer repeat finding (this study) |
| 177055  | - | 177175  | NUCmer repeat finding (this study) |
| 177169  | - | 177451  | NUCmer repeat finding (this study) |
| 197824  | - | 198205  | NUCmer repeat finding (this study) |
| 309030  | - | 309532  | NUCmer repeat finding (this study) |
| 309899  | - | 310101  | NUCmer repeat finding (this study) |
| 332699  | - | 333610  | NUCmer repeat finding (this study) |
| 333511  | - | 333734  | NUCmer repeat finding (this study) |
| 335829  | - | 336275  | NUCmer repeat finding (this study) |
| 335417  | - | 336379  | NUCmer repeat finding (this study) |
| 336566  | - | 336788  | NUCmer repeat finding (this study) |
| 338214  | - | 338450  | NUCmer repeat finding (this study) |
| 338298  | - | 338537  | NUCmer repeat finding (this study) |
| 338201  | - | 339142  | NUCmer repeat finding (this study) |
| 339373  | - | 339875  | NUCmer repeat finding (this study) |
| 366867  | - | 367146  | NUCmer repeat finding (this study) |
| 368076  | - | 368602  | NUCmer repeat finding (this study) |
| 369390  | - | 369805  | NUCmer repeat finding (this study) |
| 370548  | - | 370963  | NUCmer repeat finding (this study) |
| 371821  | - | 372375  | NUCmer repeat finding (this study) |
| 372246  | - | 372525  | NUCmer repeat finding (this study) |

|         |   |         |                                    |
|---------|---|---------|------------------------------------|
| 374567  | - | 374856  | NUCmer repeat finding (this study) |
| 374504  | - | 375058  | NUCmer repeat finding (this study) |
| 374593  | - | 375119  | NUCmer repeat finding (this study) |
| 400152  | - | 401701  | NUCmer repeat finding (this study) |
| 428385  | - | 428757  | NUCmer repeat finding (this study) |
| 428368  | - | 428760  | NUCmer repeat finding (this study) |
| 429620  | - | 429909  | NUCmer repeat finding (this study) |
| 424012  | - | 429920  | NUCmer repeat finding (this study) |
| 429766  | - | 430167  | NUCmer repeat finding (this study) |
| 429648  | - | 430190  | NUCmer repeat finding (this study) |
| 429662  | - | 430194  | NUCmer repeat finding (this study) |
| 431159  | - | 431541  | NUCmer repeat finding (this study) |
| 431025  | - | 431567  | NUCmer repeat finding (this study) |
| 432541  | - | 432929  | NUCmer repeat finding (this study) |
| 432401  | - | 432933  | NUCmer repeat finding (this study) |
| 460808  | - | 461483  | NUCmer repeat finding (this study) |
| 473744  | - | 474099  | NUCmer repeat finding (this study) |
| 475810  | - | 476177  | NUCmer repeat finding (this study) |
| 562307  | - | 562394  | NUCmer repeat finding (this study) |
| 569821  | - | 569922  | NUCmer repeat finding (this study) |
| 569877  | - | 569978  | NUCmer repeat finding (this study) |
| 577286  | - | 577438  | NUCmer repeat finding (this study) |
| 577344  | - | 577496  | NUCmer repeat finding (this study) |
| 580577  | - | 580737  | NUCmer repeat finding (this study) |
| 580654  | - | 580814  | NUCmer repeat finding (this study) |
| 606511  | - | 608060  | NUCmer repeat finding (this study) |
| 675486  | - | 675612  | NUCmer repeat finding (this study) |
| 675492  | - | 675653  | NUCmer repeat finding (this study) |
| 686110  | - | 686491  | NUCmer repeat finding (this study) |
| 798824  | - | 799109  | NUCmer repeat finding (this study) |
| 832045  | - | 832356  | NUCmer repeat finding (this study) |
| 838771  | - | 838896  | NUCmer repeat finding (this study) |
| 838486  | - | 838926  | NUCmer repeat finding (this study) |
| 840739  | - | 841665  | NUCmer repeat finding (this study) |
| 842020  | - | 842331  | NUCmer repeat finding (this study) |
| 889020  | - | 890375  | NUCmer repeat finding (this study) |
| 889021  | - | 891461  | NUCmer repeat finding (this study) |
| 908181  | - | 909346  | NUCmer repeat finding (this study) |
| 917611  | - | 917677  | NUCmer repeat finding (this study) |
| 917669  | - | 917735  | NUCmer repeat finding (this study) |
| 921744  | - | 921892  | NUCmer repeat finding (this study) |
| 921580  | - | 921893  | NUCmer repeat finding (this study) |
| 925280  | - | 925404  | NUCmer repeat finding (this study) |
| 960167  | - | 960270  | NUCmer repeat finding (this study) |
| 960213  | - | 960323  | NUCmer repeat finding (this study) |
| 960228  | - | 960324  | NUCmer repeat finding (this study) |
| 960175  | - | 960325  | NUCmer repeat finding (this study) |
| 960220  | - | 960327  | NUCmer repeat finding (this study) |
| 964605  | - | 964965  | NUCmer repeat finding (this study) |
| 964770  | - | 965086  | NUCmer repeat finding (this study) |
| 1093336 | - | 1093666 | NUCmer repeat finding (this study) |
| 1093422 | - | 1093866 | NUCmer repeat finding (this study) |
| 1093841 | - | 1094592 | NUCmer repeat finding (this study) |
| 1095120 | - | 1095317 | NUCmer repeat finding (this study) |
| 1095175 | - | 1095393 | NUCmer repeat finding (this study) |
| 1095088 | - | 1095413 | NUCmer repeat finding (this study) |
| 1095372 | - | 1095566 | NUCmer repeat finding (this study) |
| 1095301 | - | 1095739 | NUCmer repeat finding (this study) |

|         |   |         |                                    |
|---------|---|---------|------------------------------------|
| 1095936 | - | 1096687 | NUCmer repeat finding (this study) |
| 1095821 | - | 1096692 | NUCmer repeat finding (this study) |
| 1160544 | - | 1161151 | NUCmer repeat finding (this study) |
| 1160539 | - | 1161165 | NUCmer repeat finding (this study) |
| 1160546 | - | 1161167 | NUCmer repeat finding (this study) |
| 1164572 | - | 1165549 | NUCmer repeat finding (this study) |
| 1169297 | - | 1170206 | NUCmer repeat finding (this study) |
| 1169298 | - | 1170733 | NUCmer repeat finding (this study) |
| 1189340 | - | 1189539 | NUCmer repeat finding (this study) |
| 1190000 | - | 1190120 | NUCmer repeat finding (this study) |
| 1189730 | - | 1190175 | NUCmer repeat finding (this study) |
| 1191259 | - | 1191467 | NUCmer repeat finding (this study) |
| 1191724 | - | 1191882 | NUCmer repeat finding (this study) |
| 1191454 | - | 1191899 | NUCmer repeat finding (this study) |
| 1211532 | - | 1212158 | NUCmer repeat finding (this study) |
| 1216792 | - | 1217061 | NUCmer repeat finding (this study) |
| 1216441 | - | 1217067 | NUCmer repeat finding (this study) |
| 1275925 | - | 1276053 | NUCmer repeat finding (this study) |
| 1276293 | - | 1277797 | NUCmer repeat finding (this study) |
| 1277843 | - | 1278820 | NUCmer repeat finding (this study) |
| 1287355 | - | 1288094 | NUCmer repeat finding (this study) |
| 1305495 | - | 1305599 | NUCmer repeat finding (this study) |
| 1305557 | - | 1305661 | NUCmer repeat finding (this study) |
| 1339350 | - | 1340433 | NUCmer repeat finding (this study) |
| 1340642 | - | 1341288 | NUCmer repeat finding (this study) |
| 1340495 | - | 1341292 | NUCmer repeat finding (this study) |
| 1341296 | - | 1342730 | NUCmer repeat finding (this study) |
| 1357423 | - | 1357613 | NUCmer repeat finding (this study) |
| 1441366 | - | 1441638 | NUCmer repeat finding (this study) |
| 1441519 | - | 1441791 | NUCmer repeat finding (this study) |
| 1451779 | - | 1451994 | NUCmer repeat finding (this study) |
| 1451836 | - | 1451995 | NUCmer repeat finding (this study) |
| 1451778 | - | 1451998 | NUCmer repeat finding (this study) |
| 1468166 | - | 1469616 | NUCmer repeat finding (this study) |
| 1479356 | - | 1480072 | NUCmer repeat finding (this study) |
| 1481030 | - | 1481746 | NUCmer repeat finding (this study) |
| 1532540 | - | 1533653 | NUCmer repeat finding (this study) |
| 1541949 | - | 1543307 | NUCmer repeat finding (this study) |
| 1541952 | - | 1543318 | NUCmer repeat finding (this study) |
| 1633311 | - | 1633538 | NUCmer repeat finding (this study) |
| 1633531 | - | 1634790 | NUCmer repeat finding (this study) |
| 1636706 | - | 1636933 | NUCmer repeat finding (this study) |
| 1637133 | - | 1638392 | NUCmer repeat finding (this study) |
| 1644263 | - | 1644365 | NUCmer repeat finding (this study) |
| 1702677 | - | 1702843 | NUCmer repeat finding (this study) |
| 1702707 | - | 1702849 | NUCmer repeat finding (this study) |
| 1773962 | - | 1774031 | NUCmer repeat finding (this study) |
| 1774037 | - | 1774106 | NUCmer repeat finding (this study) |
| 1779809 | - | 1780054 | NUCmer repeat finding (this study) |
| 1779984 | - | 1780311 | NUCmer repeat finding (this study) |
| 1780241 | - | 1780580 | NUCmer repeat finding (this study) |
| 1780641 | - | 1782817 | NUCmer repeat finding (this study) |
| 1785877 | - | 1786318 | NUCmer repeat finding (this study) |
| 1788514 | - | 1789865 | NUCmer repeat finding (this study) |
| 1814895 | - | 1815098 | NUCmer repeat finding (this study) |
| 1814853 | - | 1815128 | NUCmer repeat finding (this study) |
| 1876112 | - | 1876668 | NUCmer repeat finding (this study) |
| 1875622 | - | 1876899 | NUCmer repeat finding (this study) |

|         |   |         |                                    |
|---------|---|---------|------------------------------------|
| 1879291 | - | 1879378 | NUCmer repeat finding (this study) |
| 1882019 | - | 1883293 | NUCmer repeat finding (this study) |
| 1895353 | - | 1895534 | NUCmer repeat finding (this study) |
| 1895410 | - | 1895591 | NUCmer repeat finding (this study) |
| 1946849 | - | 1947023 | NUCmer repeat finding (this study) |
| 1963420 | - | 1964160 | NUCmer repeat finding (this study) |
| 1982887 | - | 1983273 | NUCmer repeat finding (this study) |
| 1983043 | - | 1983350 | NUCmer repeat finding (this study) |
| 1982013 | - | 1983351 | NUCmer repeat finding (this study) |
| 1987699 | - | 1989057 | NUCmer repeat finding (this study) |
| 1987702 | - | 1989058 | NUCmer repeat finding (this study) |
| 1987703 | - | 1989059 | NUCmer repeat finding (this study) |
| 1996101 | - | 1997456 | NUCmer repeat finding (this study) |
| 1996100 | - | 1997458 | NUCmer repeat finding (this study) |
| 1996099 | - | 1997463 | NUCmer repeat finding (this study) |
| 1997453 | - | 1998612 | NUCmer repeat finding (this study) |
| 2000927 | - | 2001050 | NUCmer repeat finding (this study) |
| 2000930 | - | 2001056 | NUCmer repeat finding (this study) |
| 2025302 | - | 2026163 | NUCmer repeat finding (this study) |
| 2028426 | - | 2029242 | NUCmer repeat finding (this study) |
| 2030347 | - | 2030978 | NUCmer repeat finding (this study) |
| 2030332 | - | 2030983 | NUCmer repeat finding (this study) |
| 2059430 | - | 2059523 | NUCmer repeat finding (this study) |
| 2059507 | - | 2059600 | NUCmer repeat finding (this study) |
| 2062007 | - | 2062263 | NUCmer repeat finding (this study) |
| 2062400 | - | 2062639 | NUCmer repeat finding (this study) |
| 2074436 | - | 2074577 | NUCmer repeat finding (this study) |
| 2074492 | - | 2074633 | NUCmer repeat finding (this study) |
| 2089244 | - | 2089483 | NUCmer repeat finding (this study) |
| 2134912 | - | 2135764 | NUCmer repeat finding (this study) |
| 2163328 | - | 2163461 | NUCmer repeat finding (this study) |
| 2163397 | - | 2163530 | NUCmer repeat finding (this study) |
| 2163731 | - | 2164023 | NUCmer repeat finding (this study) |
| 2163800 | - | 2164092 | NUCmer repeat finding (this study) |
| 2165327 | - | 2165508 | NUCmer repeat finding (this study) |
| 2165402 | - | 2165583 | NUCmer repeat finding (this study) |
| 2195857 | - | 2197360 | NUCmer repeat finding (this study) |
| 2198687 | - | 2198815 | NUCmer repeat finding (this study) |
| 2262010 | - | 2263169 | NUCmer repeat finding (this study) |
| 2294817 | - | 2296422 | NUCmer repeat finding (this study) |
| 2299556 | - | 2300118 | NUCmer repeat finding (this study) |
| 2299197 | - | 2300822 | NUCmer repeat finding (this study) |
| 2300913 | - | 2302512 | NUCmer repeat finding (this study) |
| 2305625 | - | 2306187 | NUCmer repeat finding (this study) |
| 2305266 | - | 2306889 | NUCmer repeat finding (this study) |
| 2337937 | - | 2338094 | NUCmer repeat finding (this study) |
| 2340530 | - | 2340687 | NUCmer repeat finding (this study) |
| 2347380 | - | 2347554 | NUCmer repeat finding (this study) |
| 2347391 | - | 2347611 | NUCmer repeat finding (this study) |
| 2347452 | - | 2347613 | NUCmer repeat finding (this study) |
| 2358503 | - | 2359351 | NUCmer repeat finding (this study) |
| 2359727 | - | 2359994 | NUCmer repeat finding (this study) |
| 2365404 | - | 2366768 | NUCmer repeat finding (this study) |
| 2365414 | - | 2366769 | NUCmer repeat finding (this study) |
| 2365411 | - | 2366771 | NUCmer repeat finding (this study) |
| 2430115 | - | 2431471 | NUCmer repeat finding (this study) |
| 2430116 | - | 2431472 | NUCmer repeat finding (this study) |
| 2430117 | - | 2431473 | NUCmer repeat finding (this study) |



|         |   |         |                                    |
|---------|---|---------|------------------------------------|
| 2430114 | - | 2431474 | NUCmer repeat finding (this study) |
| 2439140 | - | 2439948 | NUCmer repeat finding (this study) |
| 2461320 | - | 2461447 | NUCmer repeat finding (this study) |
| 2461378 | - | 2461504 | NUCmer repeat finding (this study) |
| 2531900 | - | 2532002 | NUCmer repeat finding (this study) |
| 2531893 | - | 2532156 | NUCmer repeat finding (this study) |
| 2531946 | - | 2532209 | NUCmer repeat finding (this study) |
| 2550012 | - | 2551368 | NUCmer repeat finding (this study) |
| 2550006 | - | 2551369 | NUCmer repeat finding (this study) |
| 2550010 | - | 2551370 | NUCmer repeat finding (this study) |
| 2625890 | - | 2626536 | NUCmer repeat finding (this study) |
| 2625886 | - | 2626683 | NUCmer repeat finding (this study) |
| 2635145 | - | 2635576 | NUCmer repeat finding (this study) |
| 2635575 | - | 2636931 | NUCmer repeat finding (this study) |
| 2635577 | - | 2636932 | NUCmer repeat finding (this study) |
| 2635576 | - | 2636937 | NUCmer repeat finding (this study) |
| 2636930 | - | 2637028 | NUCmer repeat finding (this study) |
| 2637300 | - | 2637501 | NUCmer repeat finding (this study) |
| 2637258 | - | 2637533 | NUCmer repeat finding (this study) |
| 2637164 | - | 2637535 | NUCmer repeat finding (this study) |
| 2638293 | - | 2638724 | NUCmer repeat finding (this study) |
| 2639035 | - | 2639531 | NUCmer repeat finding (this study) |
| 2639515 | - | 2639613 | NUCmer repeat finding (this study) |
| 2720635 | - | 2721442 | NUCmer repeat finding (this study) |
| 2784601 | - | 2785969 | NUCmer repeat finding (this study) |
| 2784615 | - | 2785970 | NUCmer repeat finding (this study) |
| 2784614 | - | 2785977 | NUCmer repeat finding (this study) |
| 2829020 | - | 2829928 | NUCmer repeat finding (this study) |
| 2828494 | - | 2829930 | NUCmer repeat finding (this study) |
| 2866469 | - | 2867121 | NUCmer repeat finding (this study) |
| 2867125 | - | 2867777 | NUCmer repeat finding (this study) |
| 2882593 | - | 2884330 | NUCmer repeat finding (this study) |
| 2944470 | - | 2945221 | NUCmer repeat finding (this study) |
| 2944354 | - | 2945226 | NUCmer repeat finding (this study) |
| 2971757 | - | 2971987 | NUCmer repeat finding (this study) |
| 2972105 | - | 2973463 | NUCmer repeat finding (this study) |
| 2973793 | - | 2975987 | NUCmer repeat finding (this study) |
| 2978623 | - | 2979060 | NUCmer repeat finding (this study) |
| 2982945 | - | 2983854 | NUCmer repeat finding (this study) |
| 2996010 | - | 2996104 | NUCmer repeat finding (this study) |
| 2996004 | - | 2996117 | NUCmer repeat finding (this study) |
| 2996011 | - | 2996155 | NUCmer repeat finding (this study) |
| 2996055 | - | 2996168 | NUCmer repeat finding (this study) |
| 3000741 | - | 3001893 | NUCmer repeat finding (this study) |
| 3002110 | - | 3003262 | NUCmer repeat finding (this study) |
| 3007038 | - | 3007167 | NUCmer repeat finding (this study) |
| 3007091 | - | 3007220 | NUCmer repeat finding (this study) |
| 3082466 | - | 3082654 | NUCmer repeat finding (this study) |
| 3100174 | - | 3100323 | NUCmer repeat finding (this study) |
| 3100175 | - | 3102010 | NUCmer repeat finding (this study) |
| 3100486 | - | 3102227 | NUCmer repeat finding (this study) |
| 3112884 | - | 3113179 | NUCmer repeat finding (this study) |
| 3113642 | - | 3113937 | NUCmer repeat finding (this study) |
| 3116388 | - | 3117192 | NUCmer repeat finding (this study) |
| 3119183 | - | 3120015 | NUCmer repeat finding (this study) |
| 3119333 | - | 3120103 | NUCmer repeat finding (this study) |
| 3119334 | - | 3120248 | NUCmer repeat finding (this study) |
| 3119938 | - | 3120464 | NUCmer repeat finding (this study) |

|         |   |         |                                    |
|---------|---|---------|------------------------------------|
| 3119185 | - | 3120524 | NUCmer repeat finding (this study) |
| 3120523 | - | 3121879 | NUCmer repeat finding (this study) |
| 3120518 | - | 3121880 | NUCmer repeat finding (this study) |
| 3120521 | - | 3121881 | NUCmer repeat finding (this study) |
| 3120522 | - | 3121882 | NUCmer repeat finding (this study) |
| 3121934 | - | 3122406 | NUCmer repeat finding (this study) |
| 3122431 | - | 3122831 | NUCmer repeat finding (this study) |
| 3122012 | - | 3123208 | NUCmer repeat finding (this study) |
| 3122013 | - | 3123338 | NUCmer repeat finding (this study) |
| 3121937 | - | 3123354 | NUCmer repeat finding (this study) |
| 3121879 | - | 3123502 | NUCmer repeat finding (this study) |
| 3122230 | - | 3123561 | NUCmer repeat finding (this study) |
| 3123097 | - | 3123572 | NUCmer repeat finding (this study) |
| 3122011 | - | 3123576 | NUCmer repeat finding (this study) |
| 3122229 | - | 3123577 | NUCmer repeat finding (this study) |
| 3122436 | - | 3123581 | NUCmer repeat finding (this study) |
| 3132892 | - | 3133455 | NUCmer repeat finding (this study) |
| 3135788 | - | 3136351 | NUCmer repeat finding (this study) |
| 3155883 | - | 3156088 | NUCmer repeat finding (this study) |
| 3155937 | - | 3156089 | NUCmer repeat finding (this study) |
| 3171468 | - | 3171572 | NUCmer repeat finding (this study) |
| 3171463 | - | 3171607 | NUCmer repeat finding (this study) |
| 3171466 | - | 3171622 | NUCmer repeat finding (this study) |
| 3171522 | - | 3171626 | NUCmer repeat finding (this study) |
| 3171525 | - | 3171627 | NUCmer repeat finding (this study) |
| 3189482 | - | 3189567 | NUCmer repeat finding (this study) |
| 3189539 | - | 3189624 | NUCmer repeat finding (this study) |
| 3192195 | - | 3192300 | NUCmer repeat finding (this study) |
| 3192257 | - | 3192352 | NUCmer repeat finding (this study) |
| 3192248 | - | 3192353 | NUCmer repeat finding (this study) |
| 3192204 | - | 3192354 | NUCmer repeat finding (this study) |
| 3194138 | - | 3194451 | NUCmer repeat finding (this study) |
| 3194139 | - | 3195506 | NUCmer repeat finding (this study) |
| 3232651 | - | 3232810 | NUCmer repeat finding (this study) |
| 3232653 | - | 3232865 | NUCmer repeat finding (this study) |
| 3232707 | - | 3232866 | NUCmer repeat finding (this study) |
| 3239479 | - | 3239582 | NUCmer repeat finding (this study) |
| 3239471 | - | 3239743 | NUCmer repeat finding (this study) |
| 3239526 | - | 3239829 | NUCmer repeat finding (this study) |
| 3247062 | - | 3248167 | NUCmer repeat finding (this study) |
| 3252477 | - | 3253581 | NUCmer repeat finding (this study) |
| 3317534 | - | 3317739 | NUCmer repeat finding (this study) |
| 3319469 | - | 3319558 | NUCmer repeat finding (this study) |
| 3319570 | - | 3319657 | NUCmer repeat finding (this study) |
| 3334063 | - | 3334386 | NUCmer repeat finding (this study) |
| 3333758 | - | 3335596 | NUCmer repeat finding (this study) |
| 3336504 | - | 3336744 | NUCmer repeat finding (this study) |
| 3336563 | - | 3336802 | NUCmer repeat finding (this study) |
| 3351091 | - | 3351158 | NUCmer repeat finding (this study) |
| 3351147 | - | 3351214 | NUCmer repeat finding (this study) |
| 3376927 | - | 3377391 | NUCmer repeat finding (this study) |
| 3377649 | - | 3378269 | NUCmer repeat finding (this study) |
| 3378333 | - | 3378450 | NUCmer repeat finding (this study) |
| 3379364 | - | 3379828 | NUCmer repeat finding (this study) |
| 3380089 | - | 3380708 | NUCmer repeat finding (this study) |
| 3380911 | - | 3381026 | NUCmer repeat finding (this study) |
| 3381312 | - | 3382747 | NUCmer repeat finding (this study) |
| 3381313 | - | 3382749 | NUCmer repeat finding (this study) |

|         |   |         |                                    |
|---------|---|---------|------------------------------------|
| 3481325 | - | 3482760 | NUCmer repeat finding (this study) |
| 3483946 | - | 3485111 | NUCmer repeat finding (this study) |
| 3528675 | - | 3529162 | NUCmer repeat finding (this study) |
| 3551225 | - | 3552584 | NUCmer repeat finding (this study) |
| 3551230 | - | 3552585 | NUCmer repeat finding (this study) |
| 3551227 | - | 3552587 | NUCmer repeat finding (this study) |
| 3552705 | - | 3554067 | NUCmer repeat finding (this study) |
| 3552713 | - | 3554068 | NUCmer repeat finding (this study) |
| 3552709 | - | 3554070 | NUCmer repeat finding (this study) |
| 3594263 | - | 3594402 | NUCmer repeat finding (this study) |
| 3594319 | - | 3594458 | NUCmer repeat finding (this study) |
| 3663699 | - | 3663825 | NUCmer repeat finding (this study) |
| 3663860 | - | 3663987 | NUCmer repeat finding (this study) |
| 3653792 | - | 3663995 | NUCmer repeat finding (this study) |
| 3710381 | - | 3711737 | NUCmer repeat finding (this study) |
| 3710380 | - | 3711738 | NUCmer repeat finding (this study) |
| 3710382 | - | 3712822 | NUCmer repeat finding (this study) |
| 3729364 | - | 3729681 | NUCmer repeat finding (this study) |
| 3730353 | - | 3731031 | NUCmer repeat finding (this study) |
| 3730351 | - | 3731064 | NUCmer repeat finding (this study) |
| 3732081 | - | 3732759 | NUCmer repeat finding (this study) |
| 3732079 | - | 3732792 | NUCmer repeat finding (this study) |
| 3735636 | - | 3736314 | NUCmer repeat finding (this study) |
| 3743198 | - | 3743501 | NUCmer repeat finding (this study) |
| 3743508 | - | 3743602 | NUCmer repeat finding (this study) |
| 3743711 | - | 3744009 | NUCmer repeat finding (this study) |
| 3743710 | - | 3744269 | NUCmer repeat finding (this study) |
| 3744460 | - | 3745336 | NUCmer repeat finding (this study) |
| 3744704 | - | 3745407 | NUCmer repeat finding (this study) |
| 3745500 | - | 3746006 | NUCmer repeat finding (this study) |
| 3746513 | - | 3747213 | NUCmer repeat finding (this study) |
| 3746540 | - | 3747233 | NUCmer repeat finding (this study) |
| 3746507 | - | 3747571 | NUCmer repeat finding (this study) |
| 3746616 | - | 3747586 | NUCmer repeat finding (this study) |
| 3746511 | - | 3747596 | NUCmer repeat finding (this study) |
| 3746303 | - | 3747763 | NUCmer repeat finding (this study) |
| 3748283 | - | 3748956 | NUCmer repeat finding (this study) |
| 3748322 | - | 3749015 | NUCmer repeat finding (this study) |
| 3748141 | - | 3749092 | NUCmer repeat finding (this study) |
| 3750167 | - | 3750773 | NUCmer repeat finding (this study) |
| 3750140 | - | 3750802 | NUCmer repeat finding (this study) |
| 3750137 | - | 3750862 | NUCmer repeat finding (this study) |
| 3750241 | - | 3751192 | NUCmer repeat finding (this study) |
| 3750134 | - | 3751201 | NUCmer repeat finding (this study) |
| 3751635 | - | 3753178 | NUCmer repeat finding (this study) |
| 3753331 | - | 3754361 | NUCmer repeat finding (this study) |
| 3755952 | - | 3756266 | NUCmer repeat finding (this study) |
| 3755951 | - | 3756510 | NUCmer repeat finding (this study) |
| 3756701 | - | 3757577 | NUCmer repeat finding (this study) |
| 3756933 | - | 3757609 | NUCmer repeat finding (this study) |
| 3757046 | - | 3757972 | NUCmer repeat finding (this study) |
| 3756942 | - | 3758031 | NUCmer repeat finding (this study) |
| 3757711 | - | 3758217 | NUCmer repeat finding (this study) |
| 3758734 | - | 3759401 | NUCmer repeat finding (this study) |
| 3758703 | - | 3759792 | NUCmer repeat finding (this study) |
| 3758496 | - | 3759959 | NUCmer repeat finding (this study) |
| 3760476 | - | 3761152 | NUCmer repeat finding (this study) |
| 3760516 | - | 3761183 | NUCmer repeat finding (this study) |

|         |   |         |                                    |
|---------|---|---------|------------------------------------|
| 3760334 | - | 3761288 | NUCmer repeat finding (this study) |
| 3762386 | - | 3763337 | NUCmer repeat finding (this study) |
| 3762388 | - | 3763361 | NUCmer repeat finding (this study) |
| 3764037 | - | 3764678 | NUCmer repeat finding (this study) |
| 3764044 | - | 3765073 | NUCmer repeat finding (this study) |
| 3764043 | - | 3765086 | NUCmer repeat finding (this study) |
| 3765550 | - | 3767096 | NUCmer repeat finding (this study) |
| 3769514 | - | 3769853 | NUCmer repeat finding (this study) |
| 3770994 | - | 3771088 | NUCmer repeat finding (this study) |
| 3795044 | - | 3796412 | NUCmer repeat finding (this study) |
| 3795055 | - | 3796416 | NUCmer repeat finding (this study) |
| 3801958 | - | 3802230 | NUCmer repeat finding (this study) |
| 3802130 | - | 3802389 | NUCmer repeat finding (this study) |
| 3820393 | - | 3820473 | NUCmer repeat finding (this study) |
| 3820391 | - | 3820532 | NUCmer repeat finding (this study) |
| 3820448 | - | 3820589 | NUCmer repeat finding (this study) |
| 3841533 | - | 3842766 | NUCmer repeat finding (this study) |
| 3842149 | - | 3842904 | NUCmer repeat finding (this study) |
| 3842947 | - | 3843702 | NUCmer repeat finding (this study) |
| 3846461 | - | 3847692 | NUCmer repeat finding (this study) |
| 3847717 | - | 3847892 | NUCmer repeat finding (this study) |
| 3883550 | - | 3884921 | NUCmer repeat finding (this study) |
| 3890772 | - | 3892133 | NUCmer repeat finding (this study) |
| 3890777 | - | 3892135 | NUCmer repeat finding (this study) |
| 3890778 | - | 3892140 | NUCmer repeat finding (this study) |
| 3894406 | - | 3895519 | NUCmer repeat finding (this study) |
| 3930989 | - | 3932758 | NUCmer repeat finding (this study) |
| 3932294 | - | 3932794 | NUCmer repeat finding (this study) |
| 3932789 | - | 3933043 | NUCmer repeat finding (this study) |
| 3932676 | - | 3933045 | NUCmer repeat finding (this study) |
| 3933381 | - | 3933560 | NUCmer repeat finding (this study) |
| 3933402 | - | 3933562 | NUCmer repeat finding (this study) |
| 3933392 | - | 3934165 | NUCmer repeat finding (this study) |
| 3933995 | - | 3934768 | NUCmer repeat finding (this study) |
| 3934655 | - | 3934894 | NUCmer repeat finding (this study) |
| 3935229 | - | 3935411 | NUCmer repeat finding (this study) |
| 3935300 | - | 3935557 | NUCmer repeat finding (this study) |
| 3934871 | - | 3935806 | NUCmer repeat finding (this study) |
| 3935844 | - | 3936026 | NUCmer repeat finding (this study) |
| 3935915 | - | 3936172 | NUCmer repeat finding (this study) |
| 3935486 | - | 3936415 | NUCmer repeat finding (this study) |
| 3941225 | - | 3941626 | NUCmer repeat finding (this study) |
| 3941561 | - | 3941965 | NUCmer repeat finding (this study) |
| 3945098 | - | 3945597 | NUCmer repeat finding (this study) |
| 3946946 | - | 3947301 | NUCmer repeat finding (this study) |
| 3946945 | - | 3947491 | NUCmer repeat finding (this study) |
| 3945778 | - | 3947535 | NUCmer repeat finding (this study) |
| 3946934 | - | 3947652 | NUCmer repeat finding (this study) |
| 3947287 | - | 3947842 | NUCmer repeat finding (this study) |
| 3947276 | - | 3948003 | NUCmer repeat finding (this study) |
| 3947639 | - | 3948005 | NUCmer repeat finding (this study) |
| 3947990 | - | 3948082 | NUCmer repeat finding (this study) |
| 3947989 | - | 3948243 | NUCmer repeat finding (this study) |
| 3948218 | - | 3948399 | NUCmer repeat finding (this study) |
| 3947881 | - | 3948433 | NUCmer repeat finding (this study) |
| 3948013 | - | 3948507 | NUCmer repeat finding (this study) |
| 3948366 | - | 3948655 | NUCmer repeat finding (this study) |
| 3948610 | - | 3948727 | NUCmer repeat finding (this study) |

|         |   |         |                                    |
|---------|---|---------|------------------------------------|
| 3948941 | - | 3949033 | NUCmer repeat finding (this study) |
| 3948312 | - | 3949401 | NUCmer repeat finding (this study) |
| 3949569 | - | 3949864 | NUCmer repeat finding (this study) |
| 3949750 | - | 3949872 | NUCmer repeat finding (this study) |
| 3948912 | - | 3950001 | NUCmer repeat finding (this study) |
| 3950830 | - | 3951329 | NUCmer repeat finding (this study) |
| 4039486 | - | 4040155 | NUCmer repeat finding (this study) |
| 4052971 | - | 4053438 | NUCmer repeat finding (this study) |
| 4053082 | - | 4053549 | NUCmer repeat finding (this study) |
| 4053634 | - | 4053900 | NUCmer repeat finding (this study) |
| 4053632 | - | 4053994 | NUCmer repeat finding (this study) |
| 4059984 | - | 4060591 | NUCmer repeat finding (this study) |
| 4078002 | - | 4078200 | NUCmer repeat finding (this study) |
| 4077999 | - | 4078201 | NUCmer repeat finding (this study) |
| 4087480 | - | 4087562 | NUCmer repeat finding (this study) |
| 4087537 | - | 4087619 | NUCmer repeat finding (this study) |
| 4120917 | - | 4120996 | NUCmer repeat finding (this study) |
| 4120974 | - | 4121053 | NUCmer repeat finding (this study) |
| 4155460 | - | 4155525 | NUCmer repeat finding (this study) |
| 4155517 | - | 4155582 | NUCmer repeat finding (this study) |
| 4156799 | - | 4156908 | NUCmer repeat finding (this study) |
| 4156858 | - | 4156967 | NUCmer repeat finding (this study) |
| 4215915 | - | 4216724 | NUCmer repeat finding (this study) |
| 4221089 | - | 4221937 | NUCmer repeat finding (this study) |
| 4222268 | - | 4222535 | NUCmer repeat finding (this study) |
| 4252882 | - | 4254332 | NUCmer repeat finding (this study) |
| 4265694 | - | 4266546 | NUCmer repeat finding (this study) |
| 4288136 | - | 4288256 | NUCmer repeat finding (this study) |
| 4301542 | - | 4301691 | NUCmer repeat finding (this study) |
| 4301685 | - | 4302008 | NUCmer repeat finding (this study) |
| 4301691 | - | 4303432 | NUCmer repeat finding (this study) |
| 4317966 | - | 4318157 | NUCmer repeat finding (this study) |
| 4318341 | - | 4319371 | NUCmer repeat finding (this study) |
| 4348725 | - | 4348832 | NUCmer repeat finding (this study) |
| 4353280 | - | 4353380 | NUCmer repeat finding (this study) |
| 4353331 | - | 4353431 | NUCmer repeat finding (this study) |

---
