# Supplementary material for: First insights on the genetic diversity of MDR Mycobacterium tuberculosis in Lebanon
Source: PubMed Central journal article supplement (PMC6311033; doi:10.1186/s12879-018-3626-3), 2018-12-29
Supplement: 12879_2018_3626_MOESM6_ESM.pdf [file 12879_2018_3626_MOESM6_ESM.pdf]

MIRU-Profiler

|         | TB4 | TB5 | TB7 | TB8 | TB9 | TB10 | TB12 | TB13 | TB14 | TB15 | TB16 | TB17 | TB20 |
|---------|-----|-----|-----|-----|-----|------|------|------|------|------|------|------|------|
| MIRU02  | N/A | 2   | 2   | 2   | 2   | 2    | 2    | 2    | 2    | 2    | 2    | 2    | 2    |
| Mtub04  | 1   | 2   | 1   | 2   | 1   | 2    | 2    | 1    | 1    | 2    | 2    | 2    | 2    |
| ETRC    | 5   | 7   | 6   | 3   | 3   | 3    | 2    | 4    | 3    | 4    | 2    | 3    | 3    |
| MIRU04  | 2   | 2   | 2   | 2   | 2   | 2    | 2    | 3    | 2    | 2    | 2    | 2    | 2    |
| MIRU40  | 2   | 2   | 2   | 2   | 3   | N/A  | N/A  | 2    | 2    | 1    | 2    | 2    | 2    |
| MIRU10  | 3   | 2   | 5   | 2   | 4   | 7    | 4    | 7    | 2    | 3    | 7    | 3    | 7    |
| MIRU16  | 2   | 3   | 3   | 3   | 1   | 3    | 3    | 3    | 1    | 3    | 3    | 3    | 3    |
| Mtub21  | 3   | 3   | 2   | 3   | 2   | 3    | 3    | 8    | 2    | 3    | 3    | 7    | 7    |
| MIRU20  | 2   | 1   | 2   | 2   | 2   | 2    | 2    | 2    | 2    | 1    | 2    | 2    | 2    |
| QUB11b  | 2   | 2   | 6   | 2   | 2   | 6    | 2    | 3    | 3    | 2    | N/A  | 6    | 2    |
| ETRA    | 3   | 6   | 2   | N/A | 3   | 3    | 3    | 4    | 4    | 3    | 3    | 3    | 3    |
| Mtub29  | 6   | 3   | 6   | 3   | 5   | 2    | 5    | 3    | 4    | 7    | 7    | 7    | 7    |
| Mtub30  | 2   | 7   | 2   | 3   | N/A | 6    | 2    | 2    | 2    | 2    | 2    | 3    | 7    |
| ETRB    | 2   | 3   | 2   | 3   | 2   | 2    | 2    | 7    | 2    | 2    | 2    | 2    | 2    |
| MIRU23  | 3   | 4   | 4   | 4   | 5   | 3    | 5    | 5    | 5    | 5    | 4    | 5    | 6    |
| MIRU24  | 1   | 4   | 1   | 2   | 1   | 1    | 1    | 2    | 1    | 1    | 1    | 1    | 1    |
| MIRU26  | 3   | 3   | 5   | 3   | 1   | 5    | 3    | 2    | 3    | 3    | 1    | 4    | 3    |
| MIRU27  | 5   | N/A | 1   | N/A | 3   | 6    | 6    | N/A  | 5    | 5    | 5    | 6    | 5    |
| Mtub34  | 2   | 3   | 3   | 3   | 3   | 3    | 3    | 3    | 3    | 3    | 3    | 3    | 3    |
| MIRU31  | 3   | 3   | 3   | 3   | 2   | 3    | 3    | 4    | 3    | 3    | 3    | 3    | 3    |
| Mtub39  | 7   | 2   | N/A | 2   | 3   | 3    | 3    | 2    | N/A  | N/A  | 2    | 7    | 3    |
| QUB26   | 4   | 2   | 4   | 2   | 4   | 5    | 4    | 5    | 4    | 4    | 4    | 5    | 6    |
| QUB4156 | 2   | 1   | 2   | 1   | 6   | 4    | 2    | 1    | 2    | 2    | 2    | 2    | 6    |
| MIRU39  | 2   | 1   | 2   | 2   | 2   | 2    | 7    | N/A  | 1    | 2    | 3    | 3    | 2    |
