# Supplementary material for: First insights on the genetic diversity of MDR Mycobacterium tuberculosis in Lebanon
Source: Springer Nature journal article supplement (doi:10.1186/s12879-018-3626-3), 2018-12-01

# IS6110 insert positions

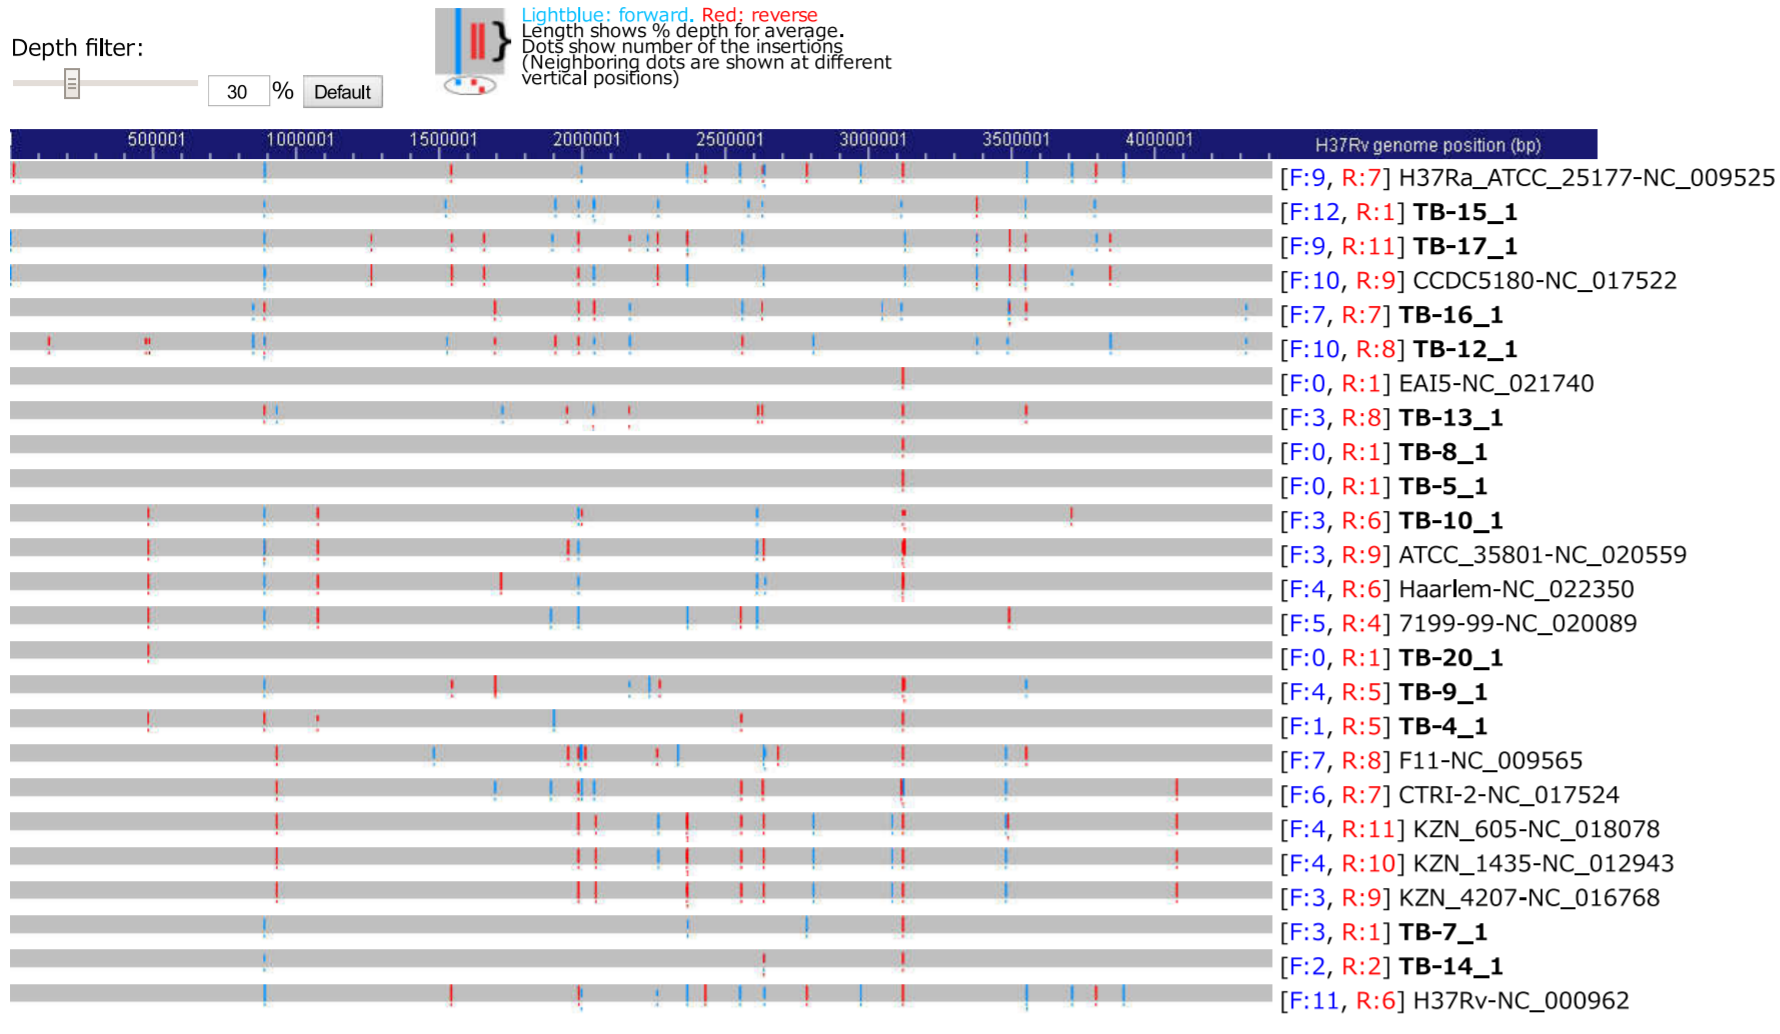

# Spoligotyping

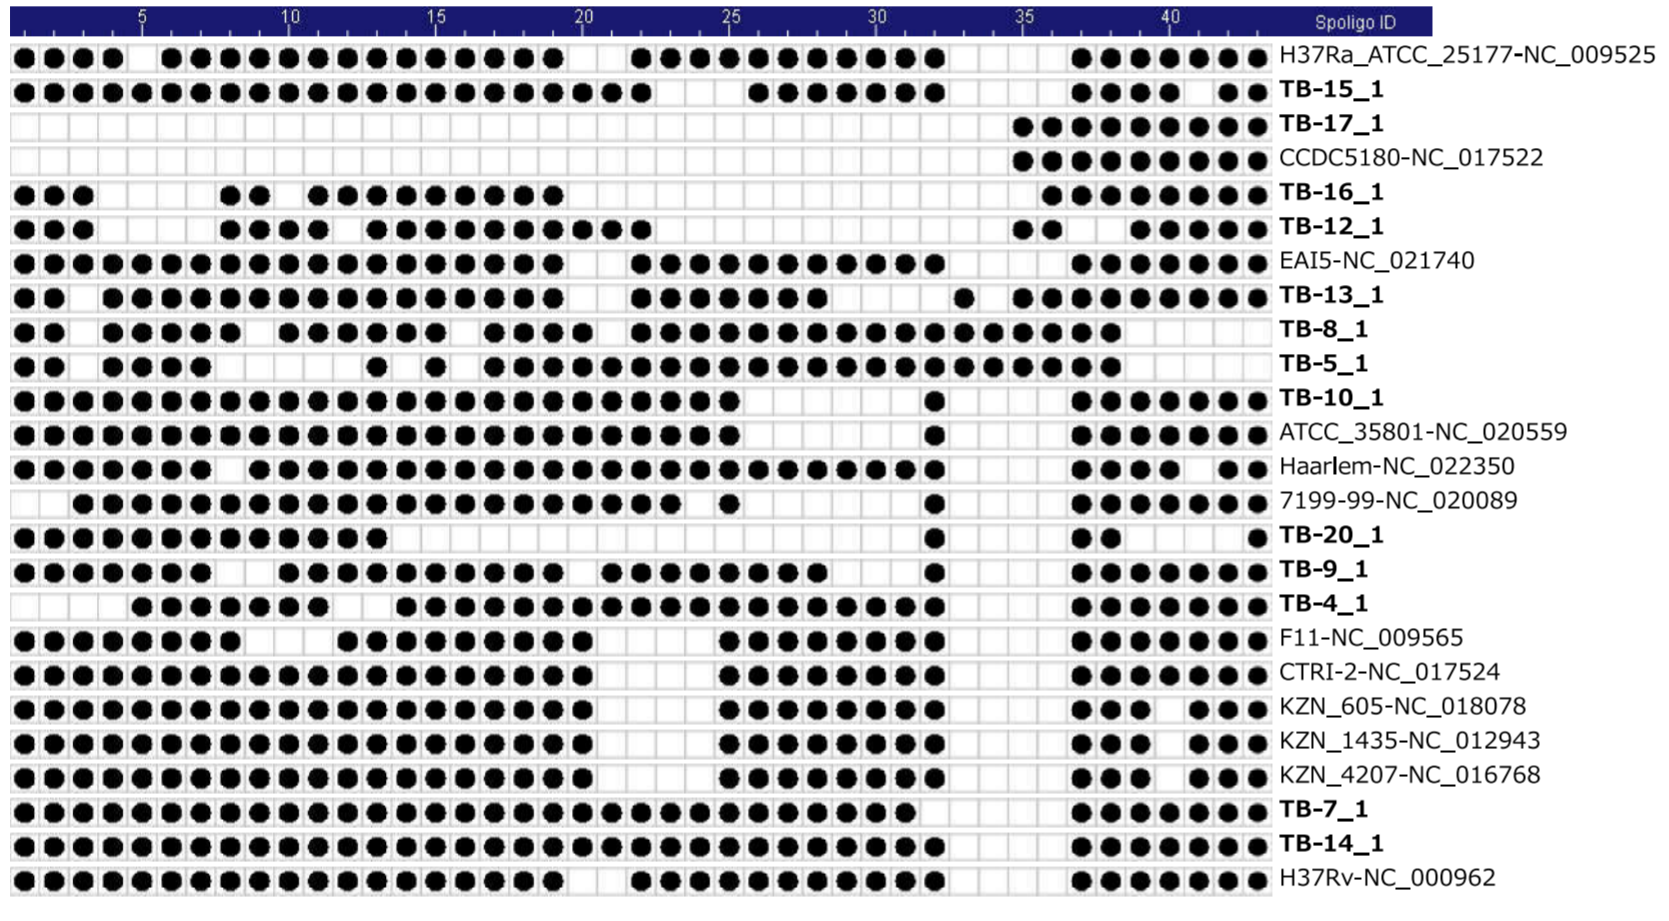

# VNTR

Download our customised 43 VNTR loci list in [PDF](#) or [Excel](#) format.

Coloring setting of TRs  Rainbow color  Monotone

Min:  Max:

Depth Filter:  %

Gray box (▒) indicates lower than the depth filter setting (%).  
 Black box (■) indicates no detection TR.  
 Stripe patterned box (▨) indicates possible mixed number of TR.

**Example** Number: Tandem repeats (TRs).  
 Blue horizontal line: Read depth ratio to avg. depth.  
 Box color: Corresponds to the TRs.  
 Lower than the depth filter setting.

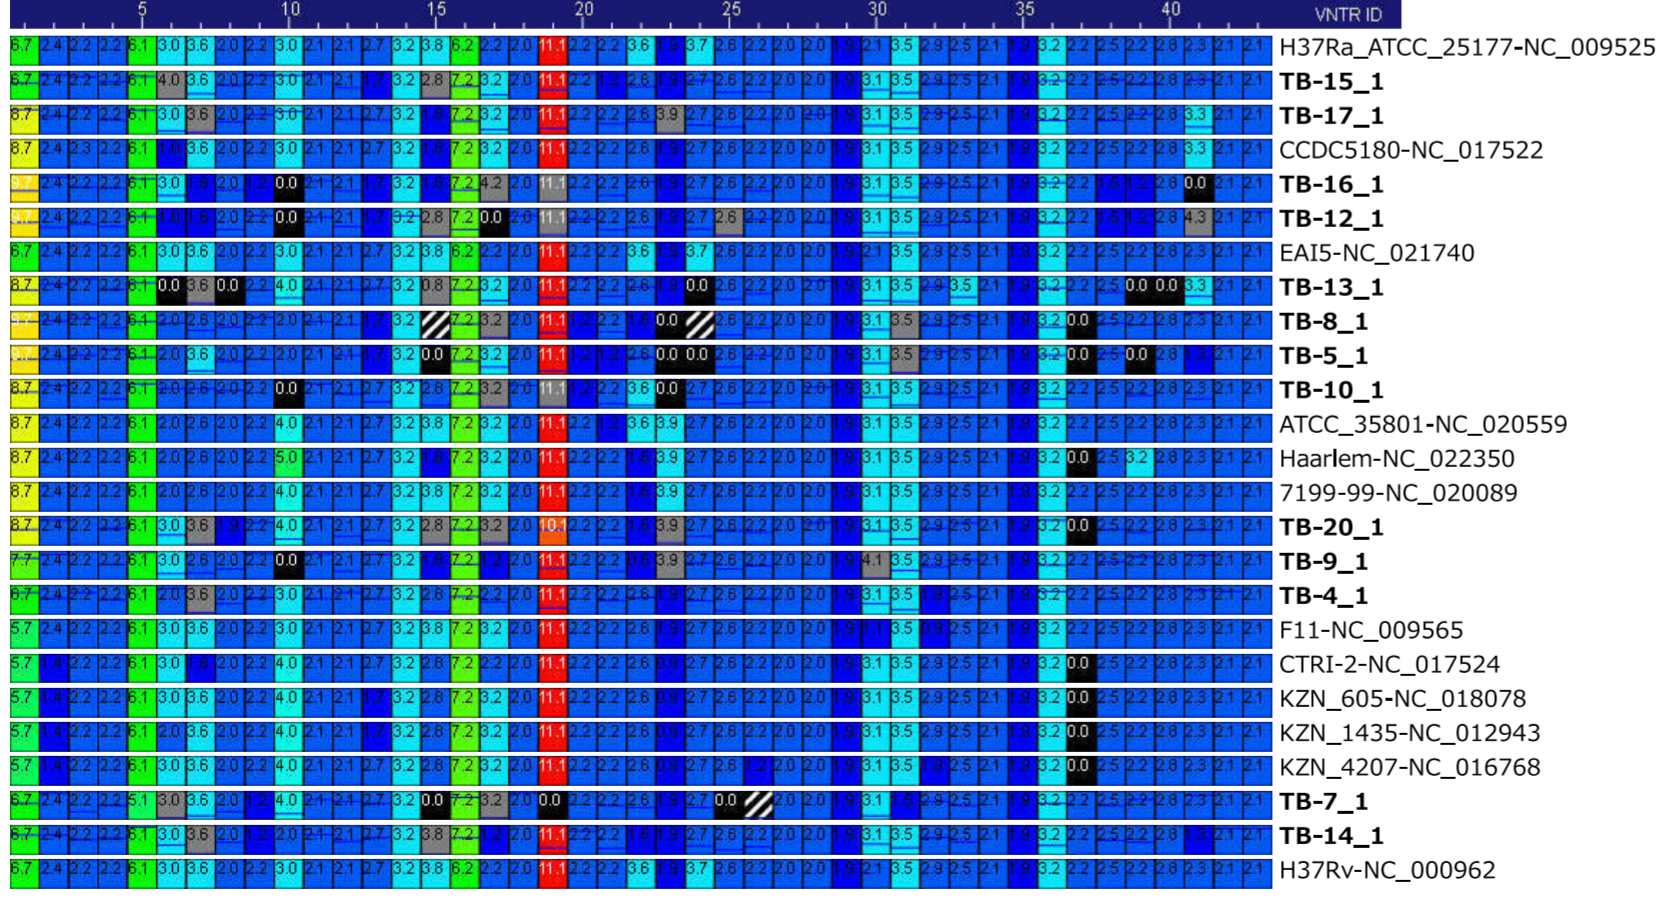

Supplement: MOESM1 [file 16362756]
