# Supplementary material for: First insights on the genetic diversity of MDR Mycobacterium tuberculosis in Lebanon
Source: Springer Nature journal article supplement (doi:10.1186/s12879-018-3626-3), 2018-12-01
Supplement: MOESM4 [file 16362756]

**S4 Table. Loci information for short MIRU-VNTR**

| sMIRU-VNTR ID | Nucleotide position on H37Rv genome (NC_000962.3) | Alias                     | Repeat unit length (bp) |
|---------------|---------------------------------------------------|---------------------------|-------------------------|
| 1             | 79505..79564                                      | Mtub02 or H37Rv_0079_9    | 9                       |
| 2             | 154112..154239                                    | MIRU2 or H37Rv_0154_53    | 53                      |
| 3             | 243135..243188                                    | -                         | 24                      |
| 4             | 272855..272938                                    | -                         | 39                      |
| 5             | 566273..566382                                    | -                         | 18                      |
| 6             | 569812..569978                                    | -                         | 56                      |
| 7             | 577286..577496                                    | ETR-C or H37Rv_0577_58    | 58                      |
| 8             | 595336..595449                                    | -                         | 58                      |
| 9             | 917611..917735                                    | -                         | 58                      |
| 10            | 960167..960323                                    | MIRU10 or 0960c           | 53                      |
| 11            | 1065356..1065417                                  | -                         | 30                      |
| 12            | 1281897..1282021                                  | QUB 1281c                 | 60                      |
| 13            | 1305495..1305661                                  | -                         | 62                      |
| 14            | 1351196..1351282                                  | -                         | 27                      |
| 15            | 1451779..1451995                                  | QUB 1451 or H37Rv_1451_57 | 57                      |
| 16            | 1612548..1612677                                  | H37Rv_1612_21 or Qub23    | 21                      |
| 17            | 1644249..1644367                                  | MIRU16 or H37Rv_1644_53   | 53                      |
| 18            | 1742790..1742848                                  | -                         | 30                      |
| 19            | 1773949..1774114                                  | -                         | 15                      |
| 20            | 1907457..1907578                                  | -                         | 56                      |
| 21            | 2059430..2059600                                  | MIRU20 or H37Rv_2059_77   | 77                      |
| 22            | 2074433..2074636                                  | Mtub24 or H37Rv_2074_56   | 56                      |
| 23            | 2401817..2401927                                  | Mtub30 or H37Rv_2401_58   | 58                      |
| 24            | 2461320..2461531                                  | ETR-B or H37Rv_2461_57    | 57                      |
| 25            | 2575324..2575393                                  | -                         | 27                      |
| 26            | 2703892..2704015                                  | -                         | 57                      |
| 27            | 2778228..2778278                                  | -                         | 26                      |
| 28            | 2827294..2827371                                  | -                         | 39                      |
| 29            | 2861024..2861093                                  | -                         | 36                      |
| 30            | 2990585..2990698                                  | Mtub31 or H37Rv_2990_55   | 55                      |
| 31            | 3007038..3007220                                  | MIRU27 or Qub5            | 53                      |
| 32            | 3171468..3171626                                  | Mtub34 or H37Rv_3171_54   | 54                      |
| 33            | 3189482..3189624                                  | -                         | 57                      |
| 34            | 3290521..3290573                                  | -                         | 25                      |
| 35            | 3316366..3316419                                  | -                         | 28                      |
| 36            | 3510683..3510778                                  | -                         | 30                      |
| 37            | 3843797..3843851                                  | -                         | 25                      |
| 38            | 4087480..4087619                                  | -                         | 57                      |
| 39            | 4155460..4155582                                  | -                         | 57                      |
| 40            | 4160537..4160587                                  | -                         | 18                      |
| 41            | 4348704..4348824                                  | MIRU39 or H37Rv_4348_53   | 53                      |
| 42            | 4373842..4373899                                  | -                         | 27                      |
| 43            | 4393771..4393827                                  | -                         | 27                      |

Composition of the different MIRU-VNTR sets:

| Loci  | Alias 1 | Alias 2 | 24 | 15 | 12 | Loci | Alias 1 | Alias 2 | 24 | 15 | 12 |
|-------|---------|---------|----|----|----|------|---------|---------|----|----|----|
| 154   | MIRU02  |         | X  |    | X  | 2401 | Mtub30  |         | X  | X  |    |
| 424   | Mtub04  |         | X  | X  |    | 2461 | ETRB    |         | X  |    |    |
| 577   | ETRC    |         | X  | X  |    | 2531 | MIRU23  |         | X  |    | X  |
| 580   | MIRU04  | ETRD    | X  | X  | X  | 2687 | MIRU24  |         | X  |    | X  |
| 802   | MIRU40  |         | X  | X  | X  | 2996 | MIRU26  |         | X  | X  | X  |
| 960   | MIRU10  |         | X  | X  | X  | 3007 | MIRU27  | QUB5    | X  |    | X  |
| 1644  | MIRU16  |         | X  | X  | X  | 3171 | Mtub34  |         | X  |    |    |
| 1955  | Mtub21  |         | X  | X  |    | 3192 | MIRU31  | ETRE    | X  | X  | X  |
| 2059  | MIRU20  |         | X  |    | X  | 3690 | Mtub39  |         | X  | X  |    |
| 2163b | QUB11b  |         | X  | X  |    | 4052 | QUB26   |         | X  | X  |    |
| 2165  | ETRA    |         | X  | X  |    | 4156 | QUB4156 |         | X  | X  |    |
| 2347  | Mtub29  |         | X  |    |    | 4348 | MIRU39  |         | X  |    | X  |
