# Supplementary material for: First insights on the genetic diversity of MDR Mycobacterium tuberculosis in Lebanon
Source: Springer Nature journal article supplement (doi:10.1186/s12879-018-3626-3), 2018-12-01
Supplement: MOESM5 [file 16362756]

| #  | Sample | Isoniazid           |                     |                     | Rifampicin         |                    |                    | Ethambutol         |                    |                    | Quinolones         |                    |                    | Streptomycin       |                    |              | Pyrazinamide |              |  |  |   |              | Amikacin | Capreomycin | Kanamycin | MDR |
|----|--------|---------------------|---------------------|---------------------|--------------------|--------------------|--------------------|--------------------|--------------------|--------------------|--------------------|--------------------|--------------------|--------------------|--------------------|--------------|--------------|--------------|--|--|---|--------------|----------|-------------|-----------|-----|
|    |        | <i>katG</i> ; 5315T | <i>rpoB</i> ; S450L | <i>embB</i> ; M306V | <i>gyrA</i> ; A90X | <i>gyrA</i> ; D94X | <i>rrs</i> ; A514X | <i>rpsL</i> ; K43R | <i>rpsL</i> ; K88R | <i>pncA</i> ; H57D | <i>pncA</i> ; S65S | <i>pncA</i> ; V44A | <i>pncA</i> ; S65F | <i>pncA</i> ; S65T | <i>pncA</i> ; A46P |              |              |              |  |  |   |              |          |             |           |     |
| 1  | TB-4   | S                   | S                   | S                   | S                  | S                  | S                  | S                  | S                  |                    |                    |                    |                    |                    |                    |              |              |              |  |  | S | S            | S        | -           |           |     |
| 2  | TB-5   | S                   | S                   | S                   | S                  | S                  | S                  | S                  | S                  |                    |                    |                    |                    | R                  | SNP2289073GC       |              |              |              |  |  |   |              | S        | S           | S         | -   |
| 3  | TB-7   | S                   | S                   | S                   | S                  | S                  | S                  | S                  | S                  |                    |                    |                    |                    | S                  |                    |              |              |              |  |  |   |              | S        | S           | S         | -   |
| 4  | TB-8   | S                   | S                   | S                   | S                  | S                  | S                  | S                  | S                  |                    |                    |                    |                    | R                  | SNP2289073GC       |              |              |              |  |  |   |              | S        | S           | S         | -   |
| 5  | TB-9   | S                   | S                   | S                   | S                  | S                  | S                  | S                  | S                  |                    |                    |                    |                    | S                  |                    |              |              |              |  |  |   |              | S        | S           | S         | -   |
| 6  | TB-10  | S                   | S                   | S                   | S                  | S                  | S                  | S                  | S                  |                    |                    |                    |                    | S                  |                    |              |              |              |  |  |   |              | S        | S           | S         | -   |
| 7  | TB-12  | R                   | SNP2155168CG        | R                   | SNP761155CT        | R                  | SNP4247429AC       | S                  |                    | R                  | SNP1472359AC       |                    |                    | R                  |                    | SNP2289047GA | SNP2289111AG |              |  |  |   |              | S        | S           | S         | +   |
| 8  | TB-13  | S                   | S                   | S                   | S                  | S                  | S                  | S                  | S                  |                    |                    |                    |                    | S                  |                    |              |              |              |  |  |   |              | S        | S           | S         | -   |
| 9  | TB-14  | S                   | S                   | S                   | S                  | R                  | SNP7570CT          | S                  |                    | S                  |                    |                    |                    | S                  |                    |              |              |              |  |  |   |              | S        | S           | S         | -   |
| 10 | TB-15  | S                   | S                   | S                   | S                  | S                  | S                  | S                  | S                  |                    |                    |                    |                    | S                  |                    |              |              |              |  |  |   |              | S        | S           | S         | -   |
| 11 | TB-16  | R                   | SNP2155168CG        | R                   | SNP761155CT        | R                  | SNP4247429AG       | S                  |                    | R                  |                    |                    | SNP781822AG        | R                  |                    |              | SNP2289048GA | SNP2289049AT |  |  |   |              | S        | S           | S         | +   |
| 12 | TB-17  | R                   | SNP2155168CG        | R                   | SNP761155CT        | R                  |                    | S                  |                    | R                  | SNP7582AC          |                    |                    | R                  |                    |              |              |              |  |  |   | SNP2289106CG | S        | S           | S         | +   |
| 13 | TB-20  | S                   | S                   | S                   | S                  | S                  | S                  | S                  |                    | S                  |                    |                    |                    | S                  |                    |              |              |              |  |  |   |              | S        | S           | S         | -   |
